# Supplementary material
Source: PubMed Central journal article supplement (PMC2535819)

Supplementary Figure 1 Koepe

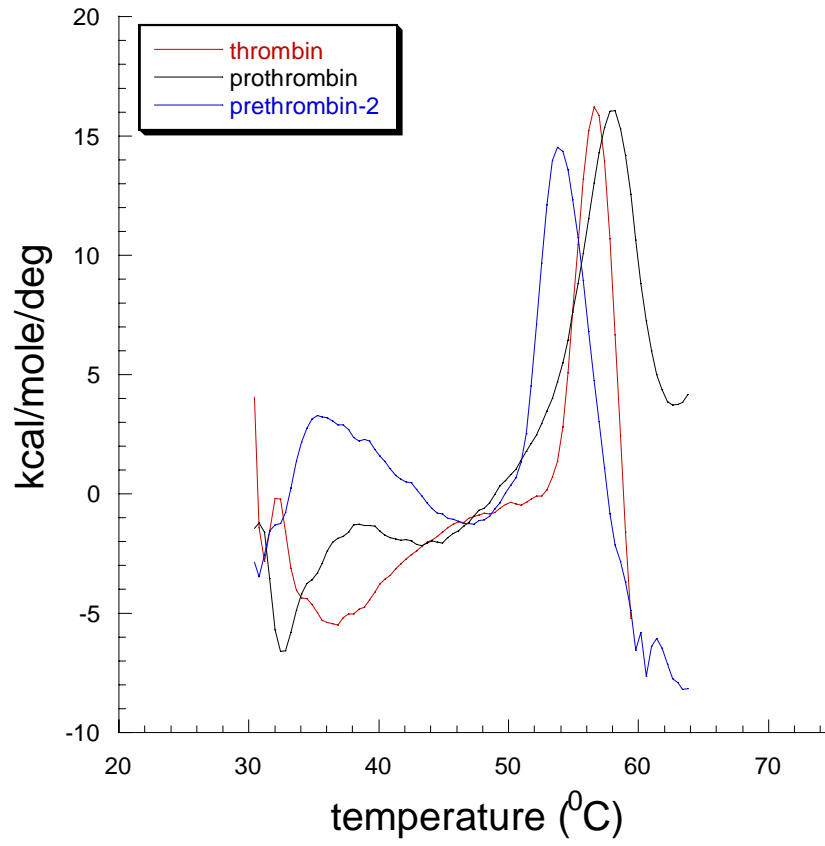

Supplement: NIHMS61142-supplement-si20060504_030.pdf [file NIHMS61142-supplement-si20060504_030.pdf]
